# Supplementary material
Source: Springer Nature journal article supplement (https://www.springermedizin.de/resource/supplementary/12891_2014_2293_MOESM1_ESM.pdf/9509900)
Supplement: MOESM1 [file 9509900]

Number of procedures per 1,000 person years

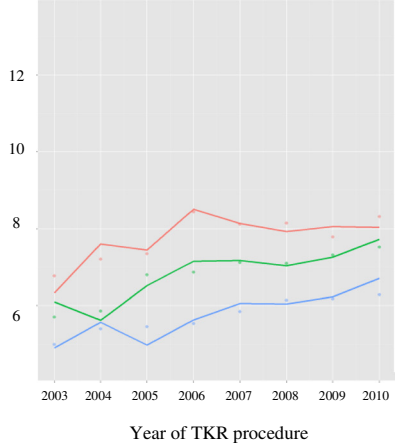

(a) Males (70-79)

Number of procedures per 1,000 person years

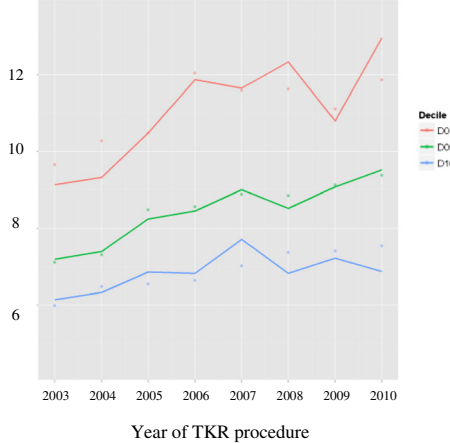

(b) Females (70-79)

\* most disadvantaged SES decile
